# Supplementary material for: Crown Plasticity and Competition for Canopy Space: A New Spatially Implicit Model Parameterized for 250 North American Tree Species
Source: PLoS One. 2007 Sep 12;2(9):e870. doi: 10.1371/journal.pone.0000870 (PMC1964803; doi:10.1371/journal.pone.0000870)
Supplement: Table S1 — Summary of ITD parameter estimates the single axis scheme, with the additional free parameter Vbias,j. Parameters marked with * were fit as species-specific free parameters; for species j, parameters marked with {double dagger} depended only on the value of Tj. Parameter Mj was fixed at 0.95 for each species j, as shown. By definition, 5% of the species have values for parameter P above the 90% range for P, and 5% have values below the range. This interval was calculated for each parameter, either using only the 30 most common species, or all species, as shown. (0.06 MB DOC) [file pone.0000870.s004.doc]

| Parameter | Average MLE | 90% range  (30 most common) | 90% range  (all species) |
| --- | --- | --- | --- |
| ***** | 0.452 | 0.19, 0.58 | 0.22, 0.74 |
| **‡** | 1.834 | 1.06, 2.20 | 1.14, 2.67 |
| **‡** | 4.794 | 2.30, 5.98 | 2.56, 7.50 |
| **‡** | 2.391 | 1.42, 2.86 | 1.52, 3.45 |
| **‡** | 0.350 | 0.24, 0.40 | 0.25, 0.47 |
| **‡** (fixed) | 0.95 | n/a | n/a |
| **‡** | 3.974 | 3.56, 4.17 | 3.60, 4.42 |
| ***** | -0.410 | -3.79, 5.28 | -4.57, 4.63 |

**Table S4.2.** Parameters for converting the trait score for species *j*, , to crown shape parameters (see eq. S2.3). Parameters marked fixedwere not estimated, but fixed at the values given. Other parameters were fit as global free parameters, as part of the single-axis scheme. These values can be used with eq. S2.3 to assign species-specific crown shape parameters to species *j*, from the value of the trait score given in Table S4.3.

| Parameter *P* |  |  |
| --- | --- | --- |
|  | 0.503 | 3.126 |
|  | 0.5 (fixed) | 10.0 (fixed) |
|  | 0.701 | 3.955 |
|  | 0.196 | 0.511 |
|  | 0.95 (fixed) | 0.95 (fixed) |
|  | 2.551 | 4.106 |
